# Supplementary material
Source: ML conference proceedings conference paper supplement (https://openreview.net/forum?id=SXTr9hIvJ1)

mnist iter [0:50]

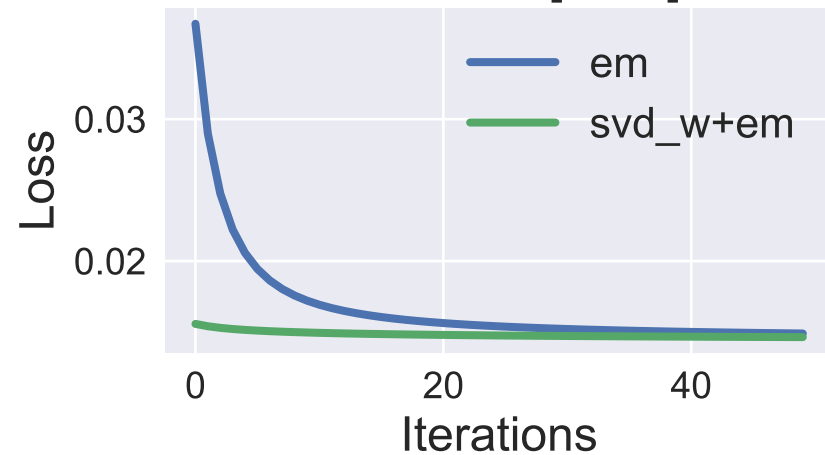

mnist iter [20:50]

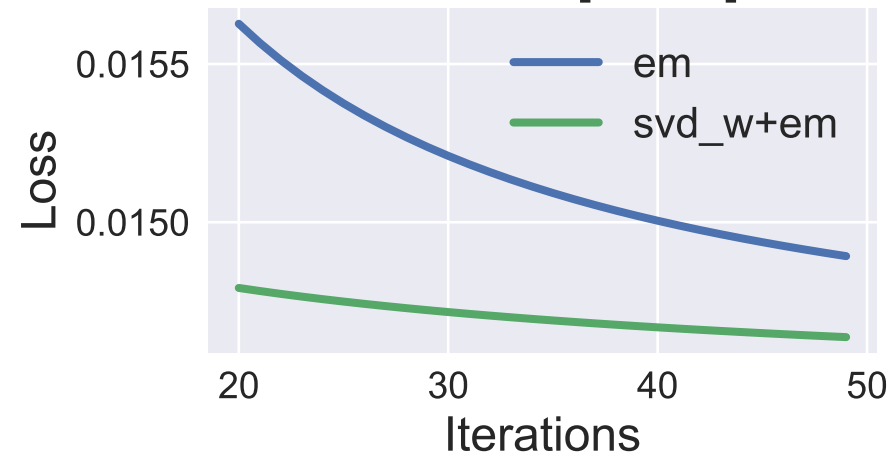

fashion\_mnist iter [0:50]

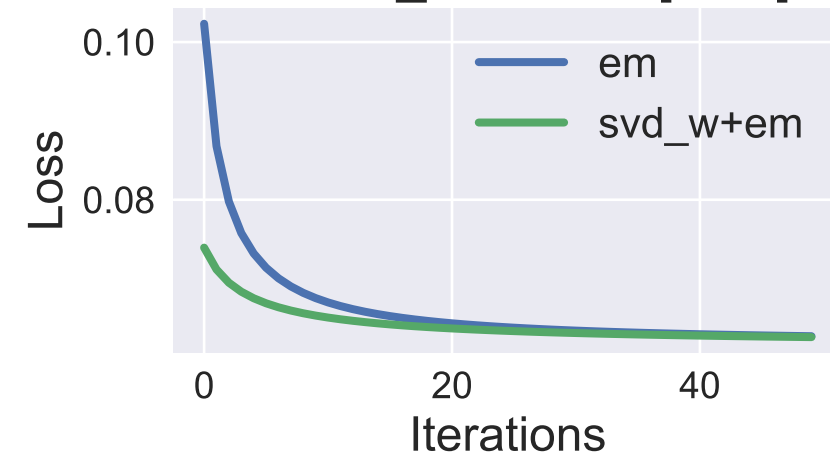

fashion\_mnist iter [20:50]

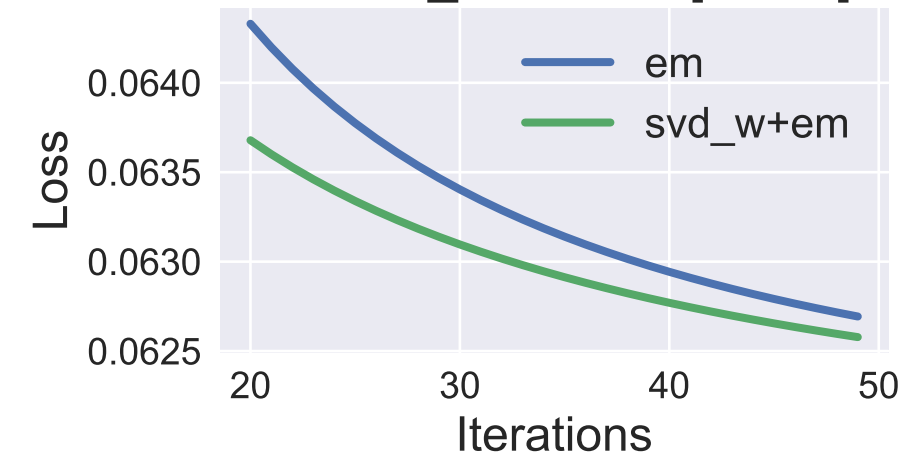

smallnorb iter [0:50]

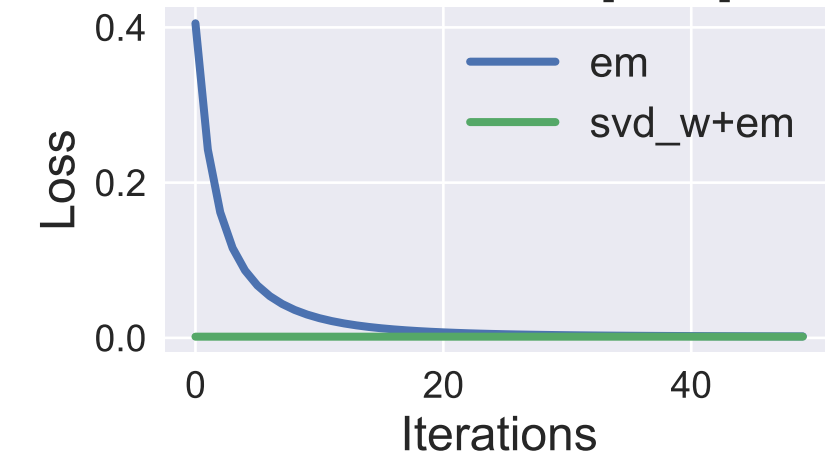

smallnorb iter [20:50]

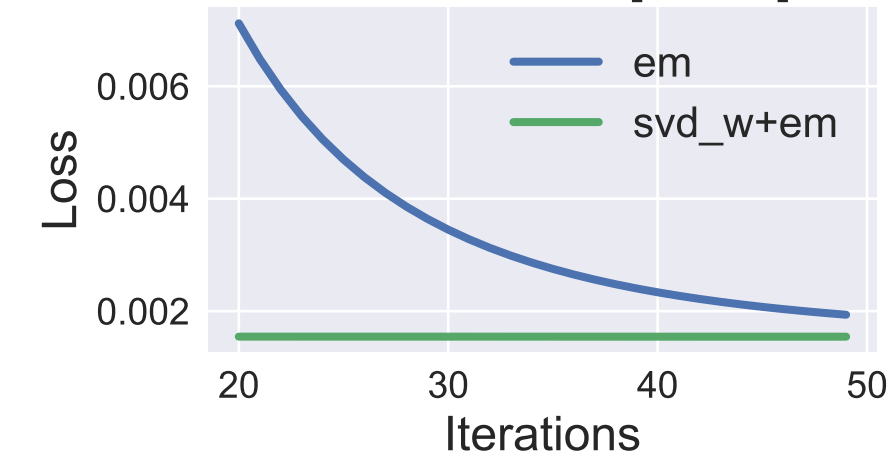

colorectal\_histology iter [0:50]

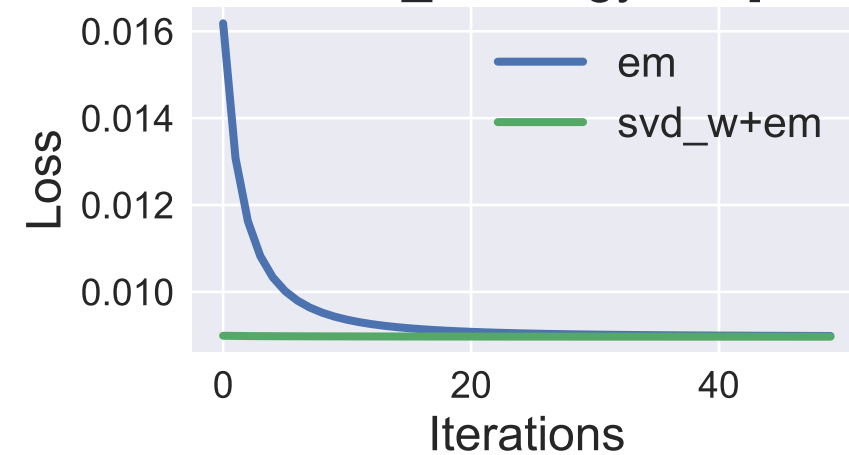

colorectal\_histology iter [20:50]

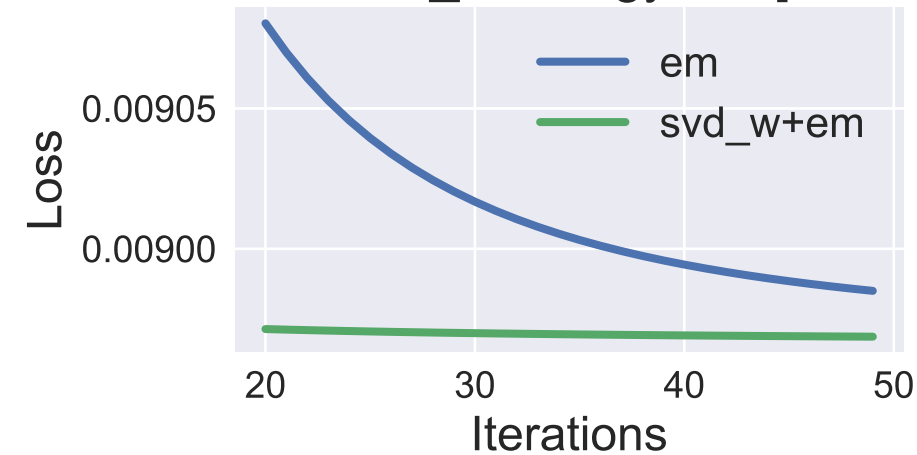

Supplement: supplementary_material [file attachment]
