# Supplementary material
Source: ML conference proceedings conference paper supplement (https://openreview.net/forum?id=SXTr9hIvJ1)

# Singular values for fashion\_mnist

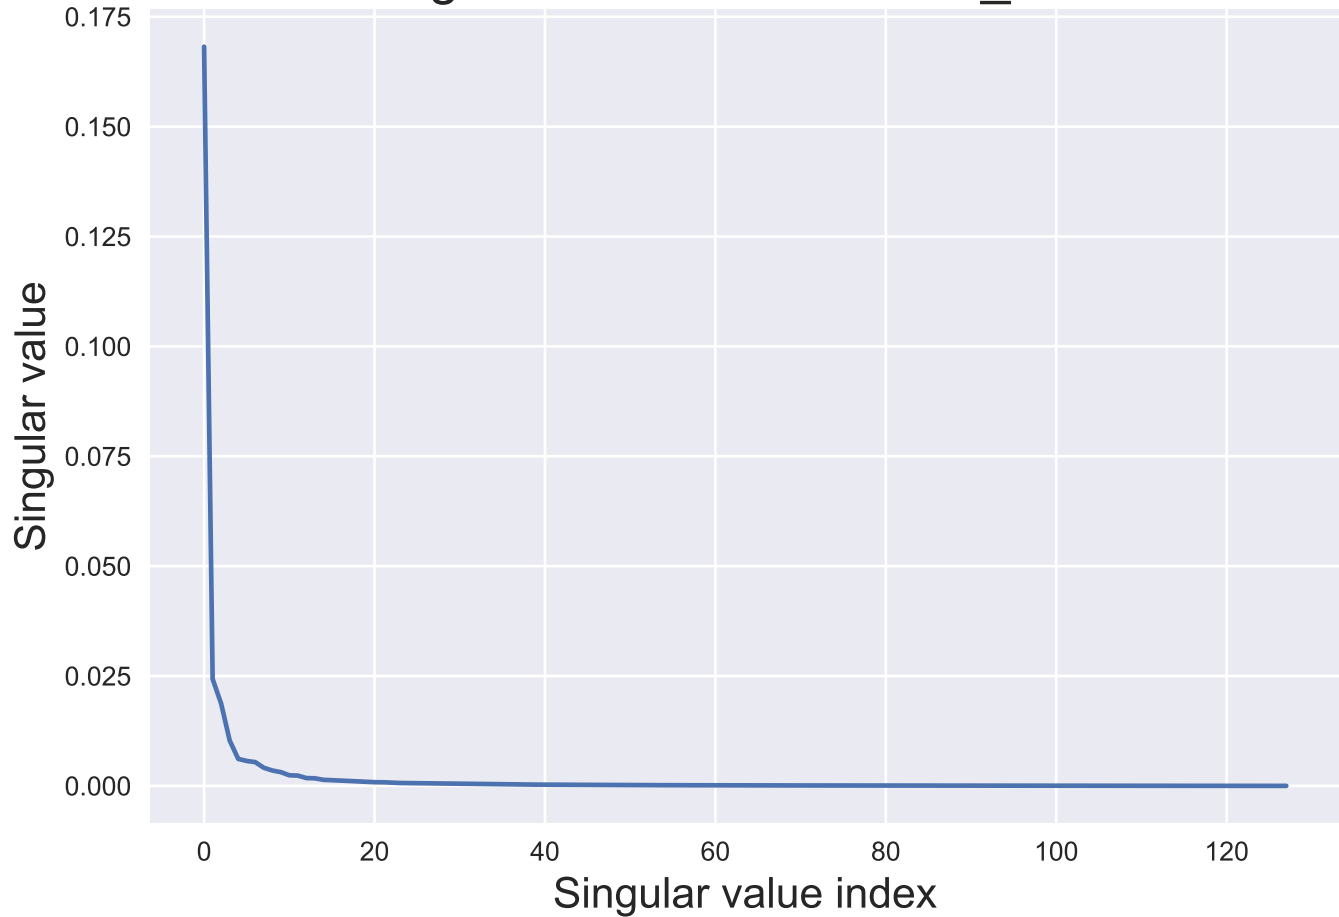

Supplement: supplementary_material [file attachment]

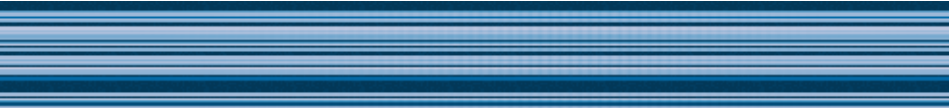

Supplement: supplementary_material [file attachment]

## Singular values for mnist

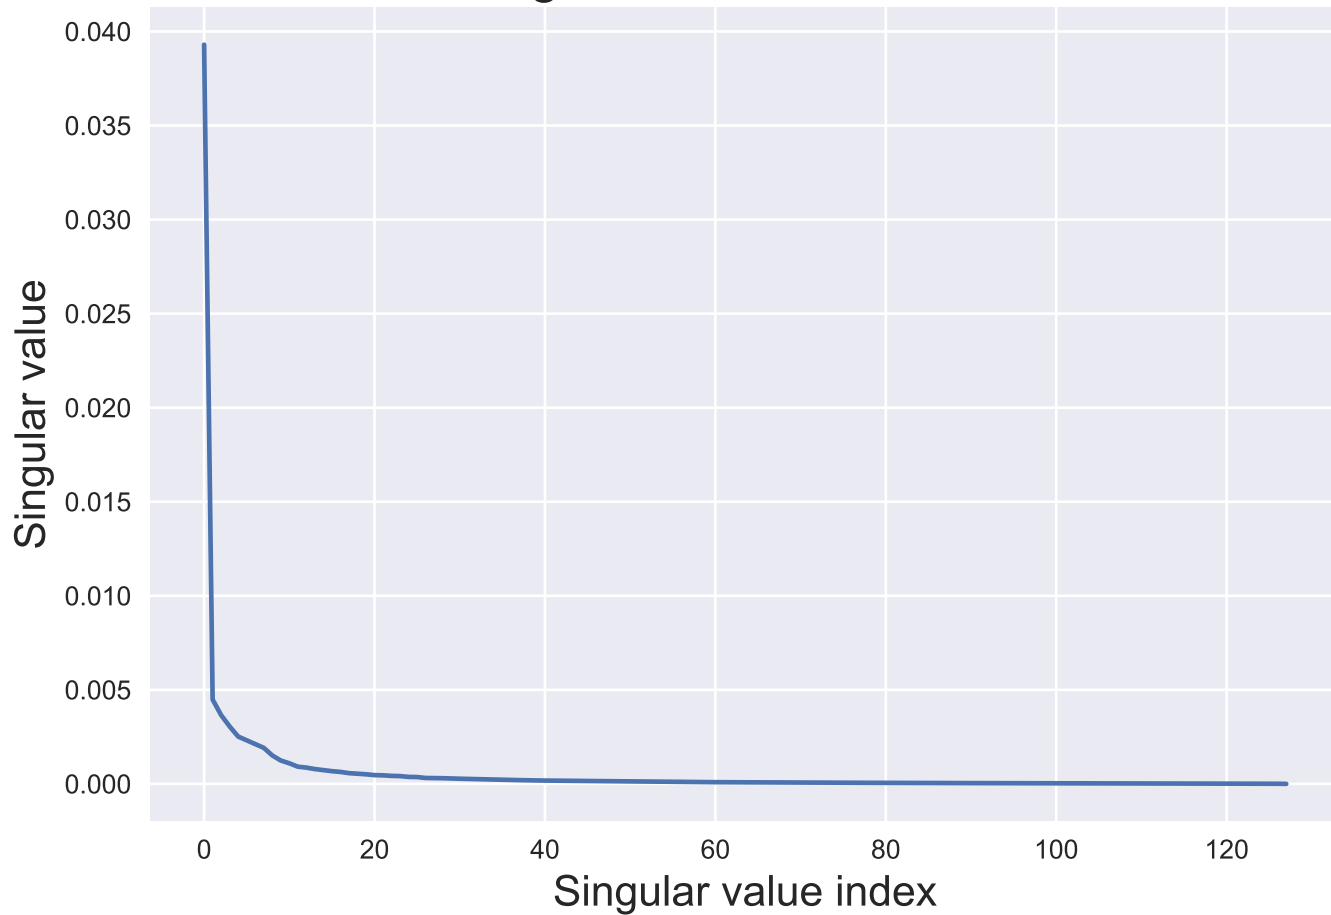

Supplement: supplementary_material [file attachment]

mnist

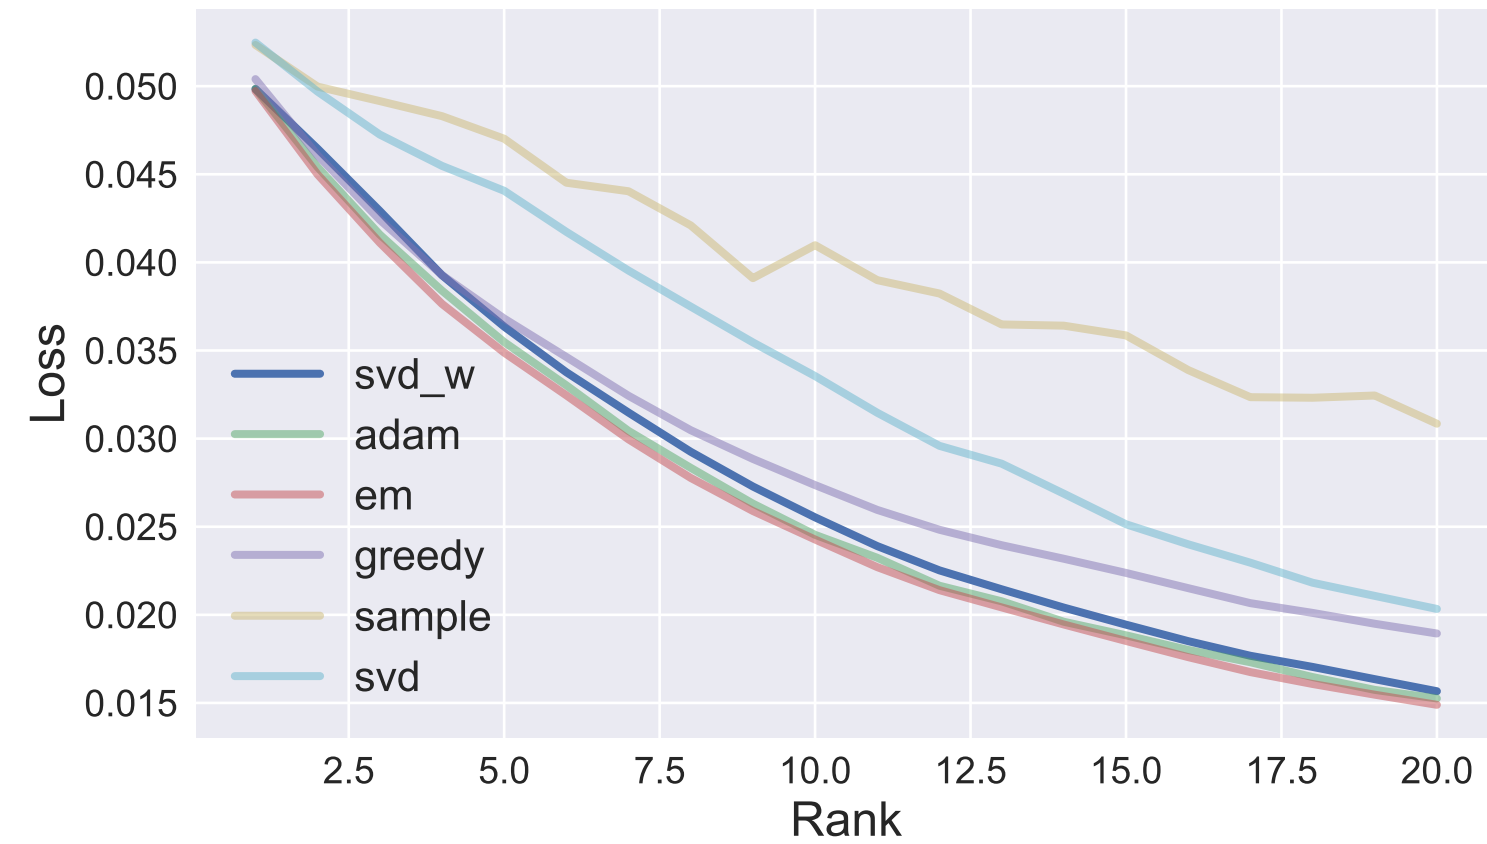

fashion\_mnist

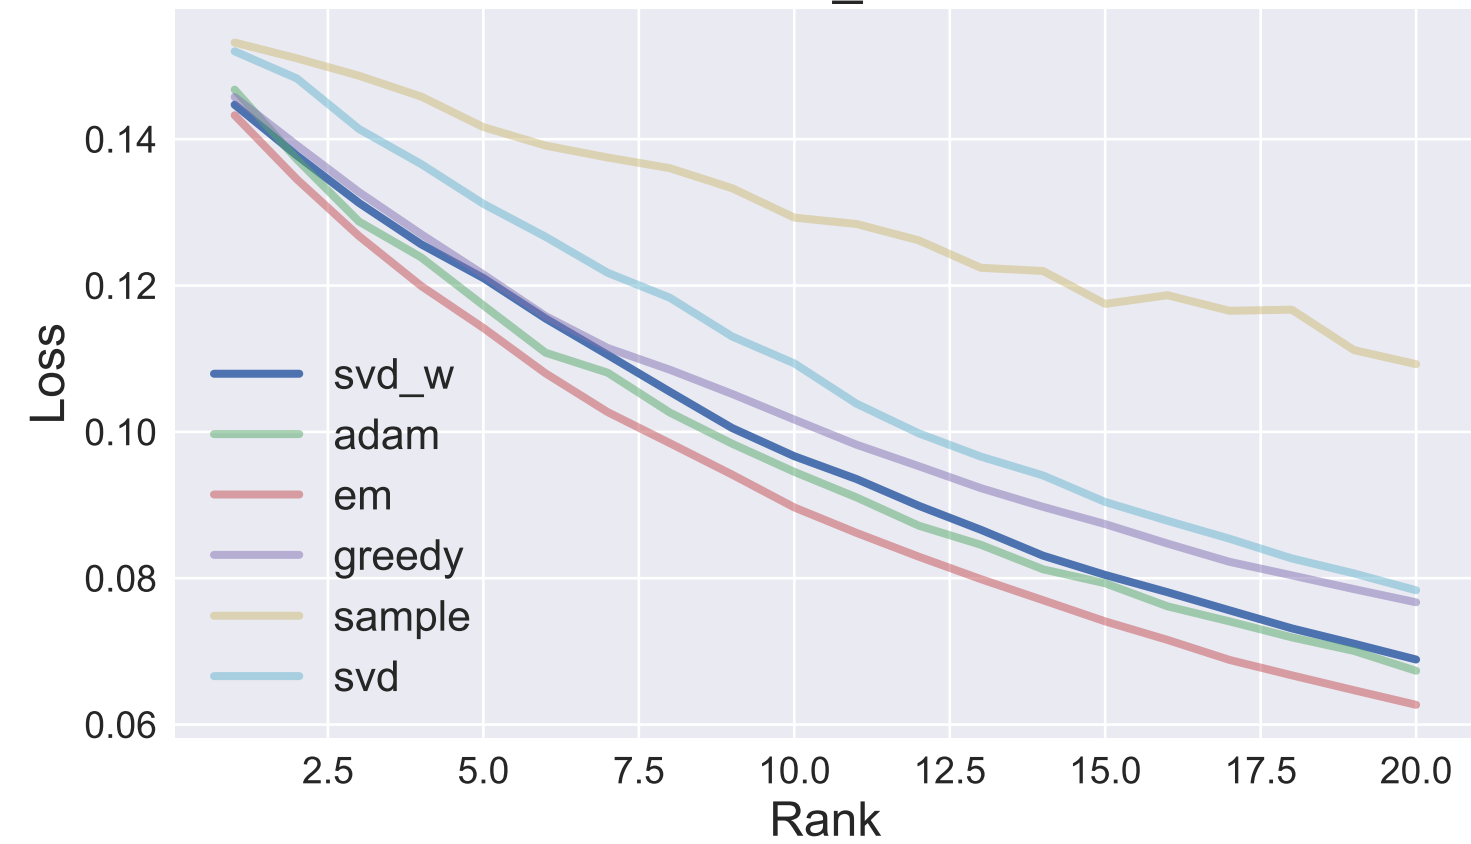

smallnorb

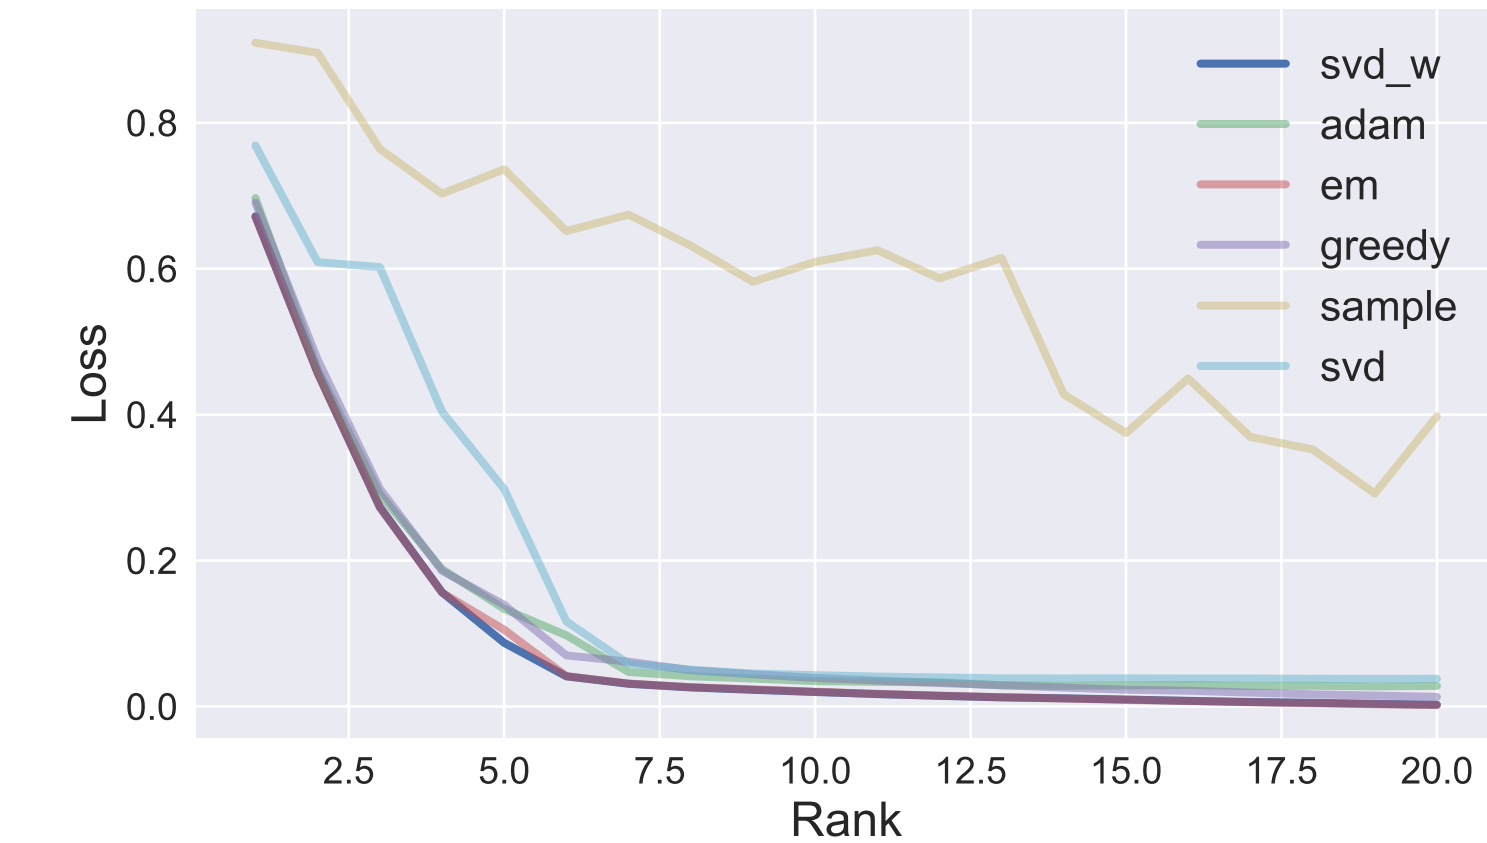

colorectal\_histology

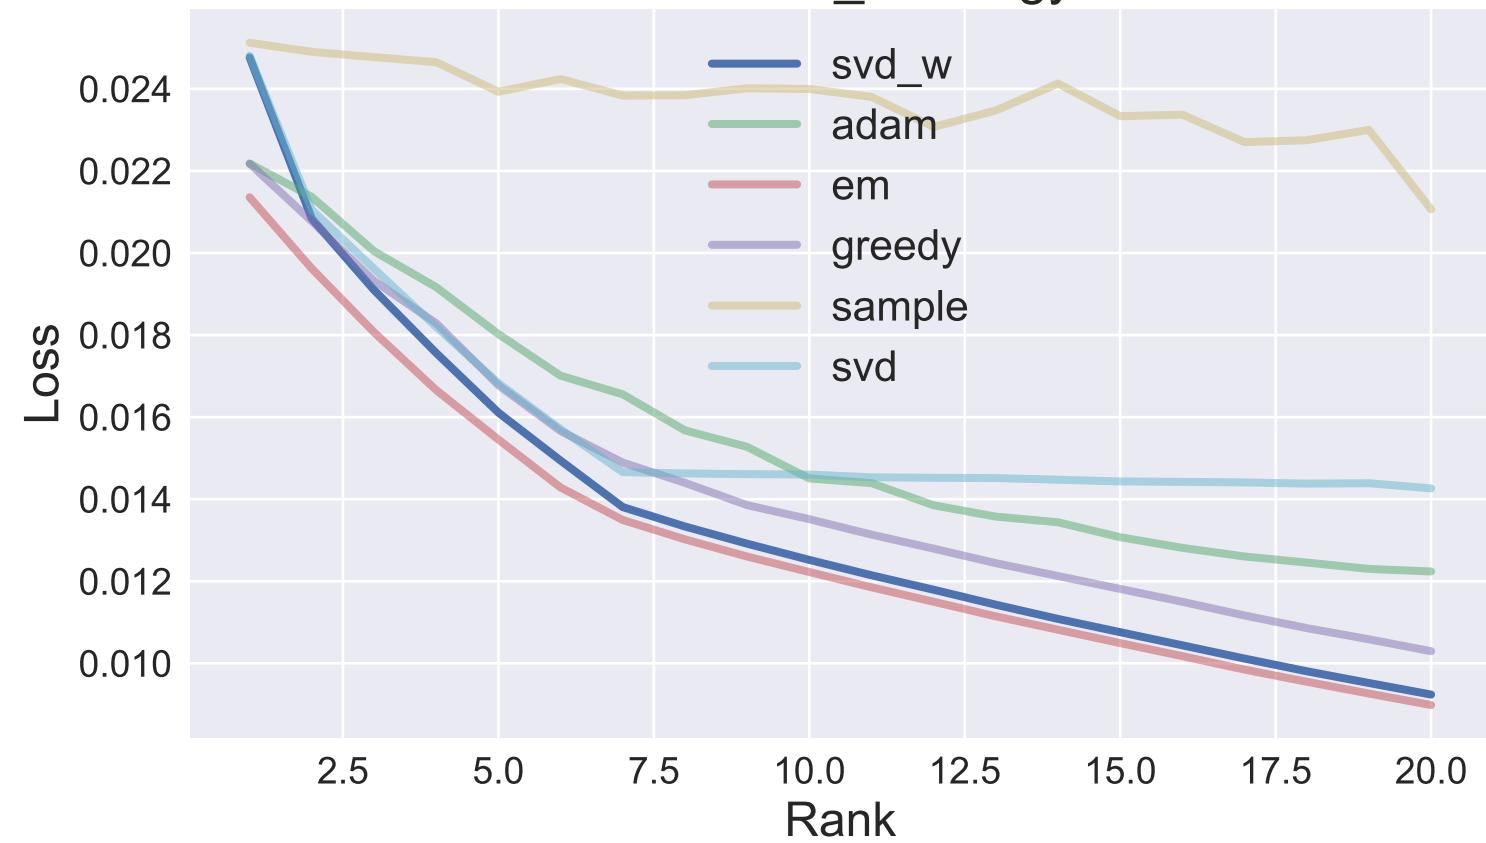

Supplement: supplementary_material [file attachment]

Singular values for smallnorb

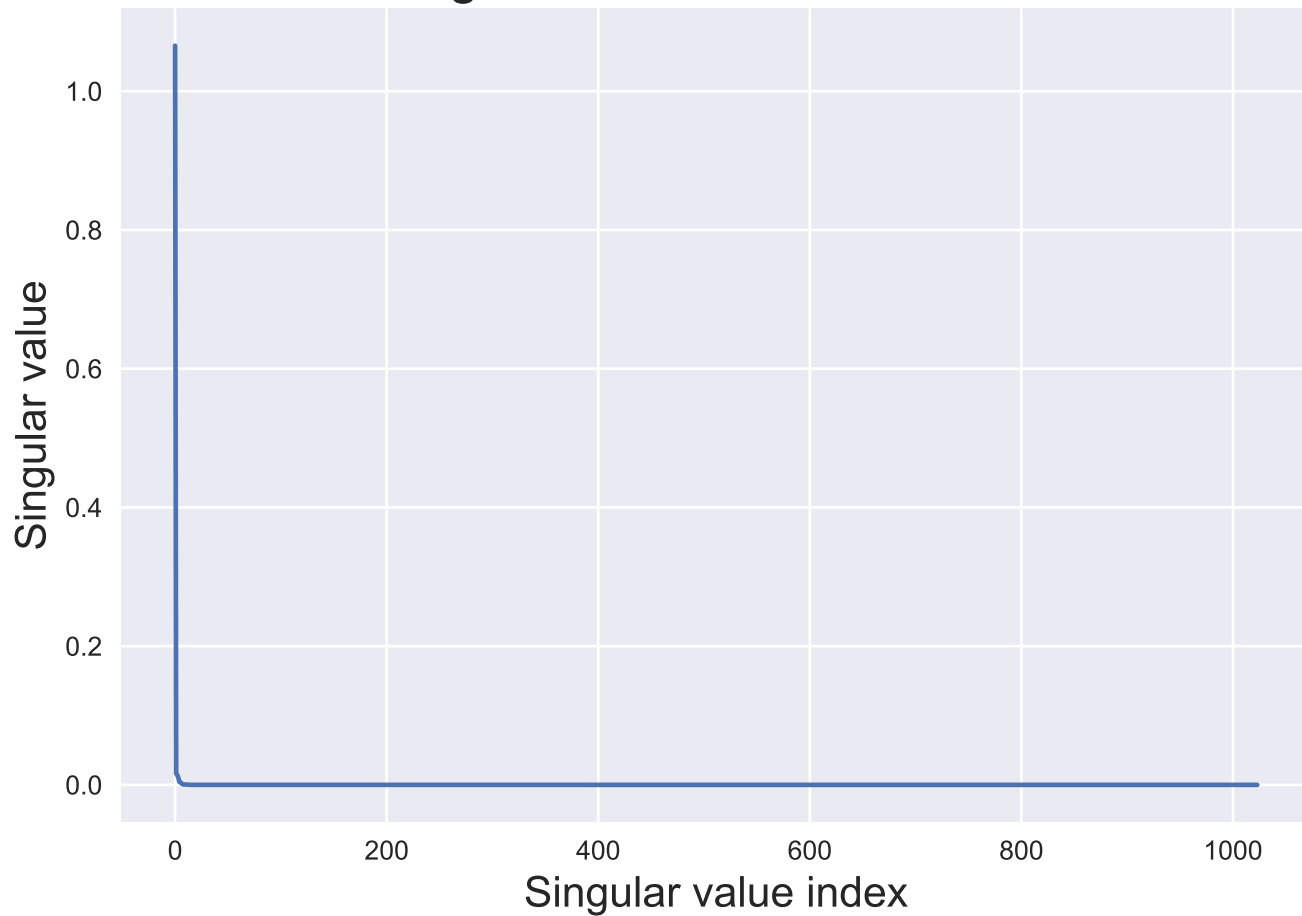

Supplement: supplementary_material [file attachment]

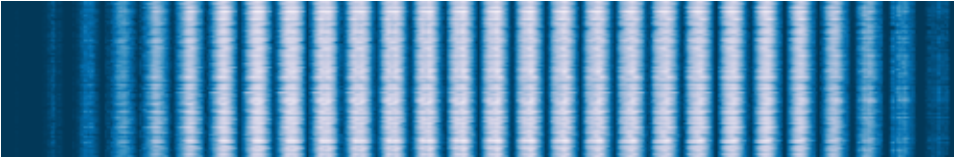

Supplement: supplementary_material [file attachment]

Singular values for colorectal\_histology

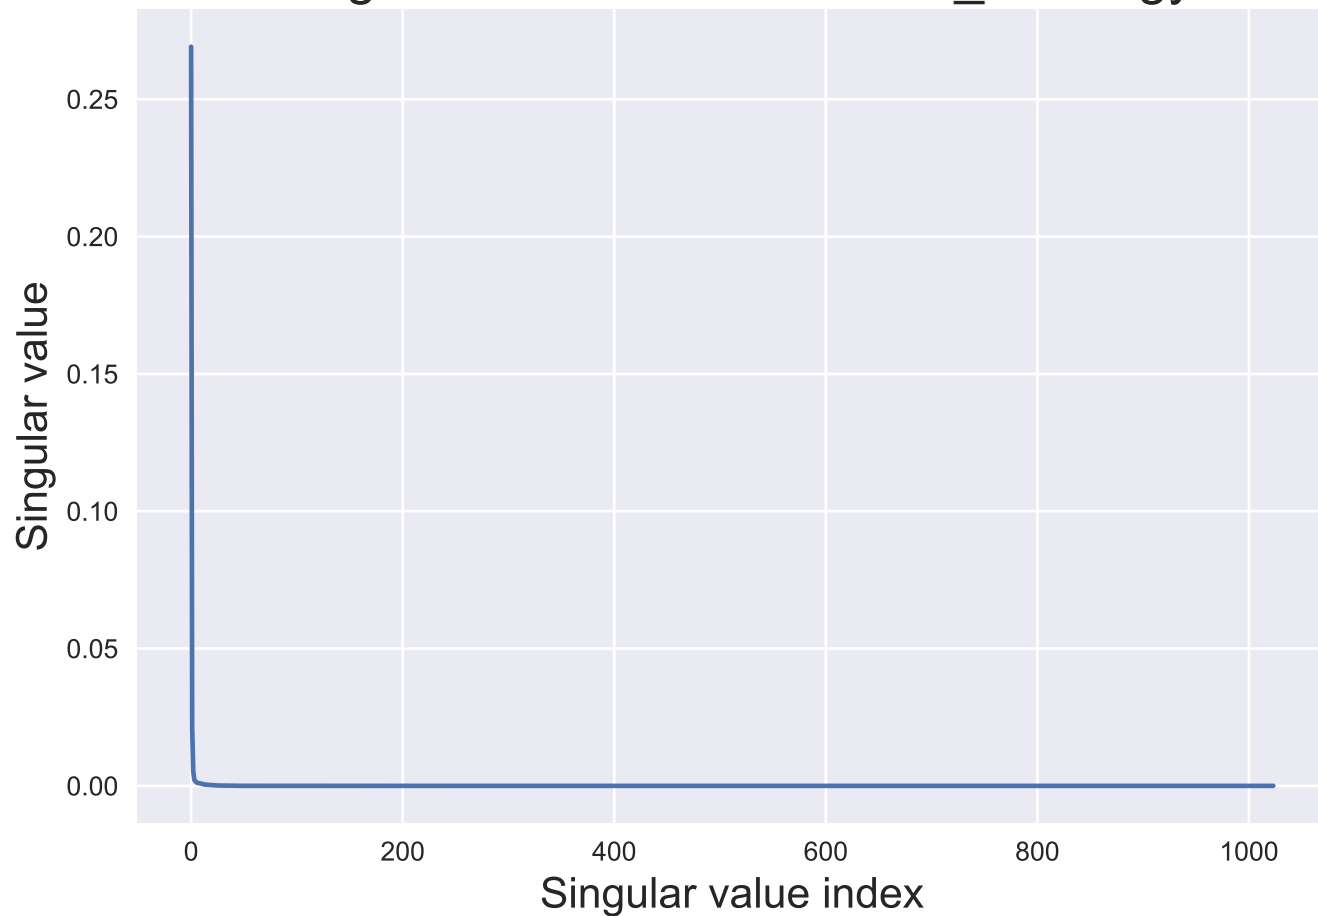

Supplement: supplementary_material [file attachment]

mnist

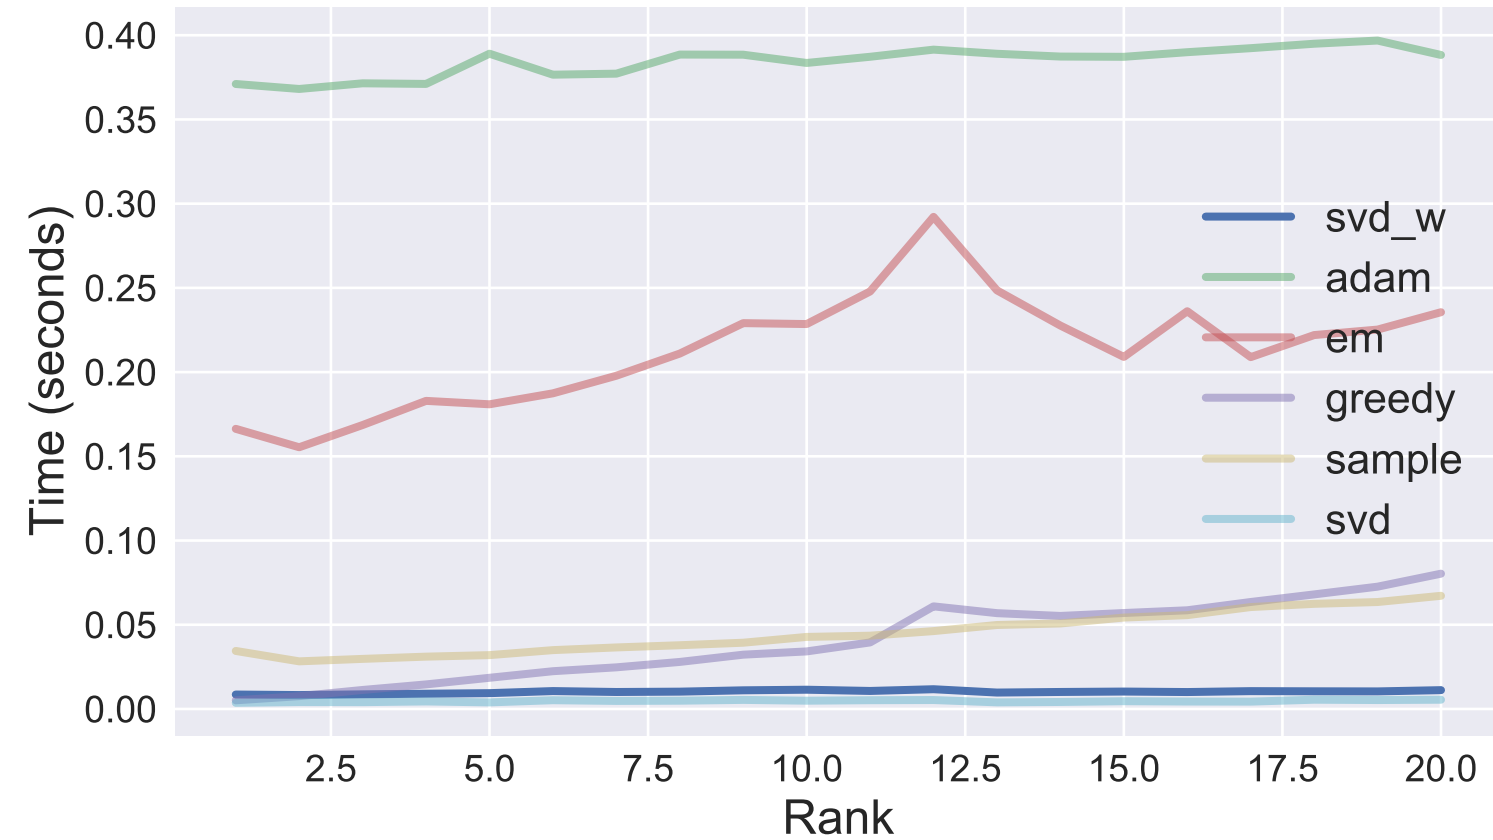

fashion\_mnist

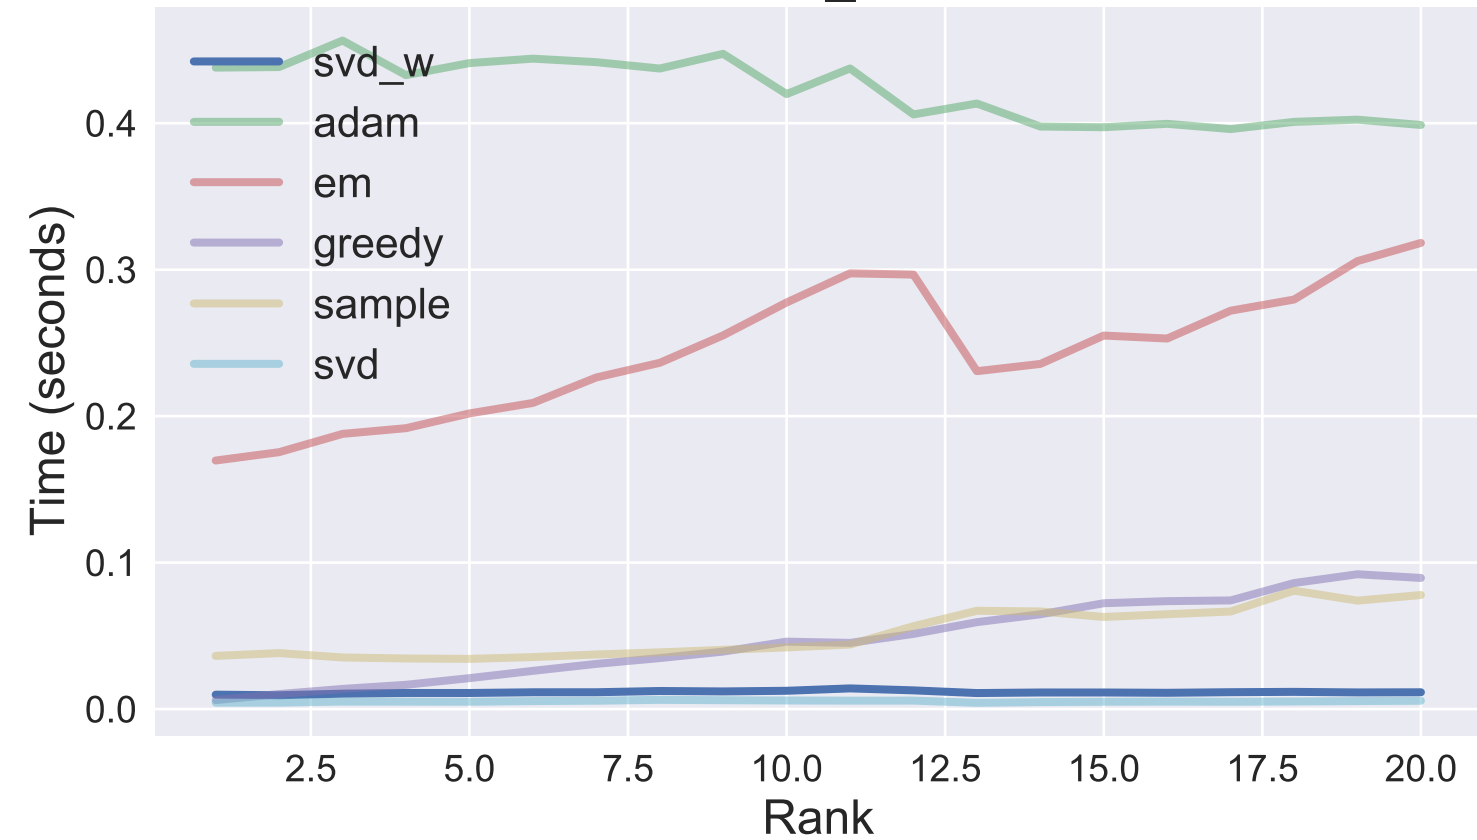

smallnorb

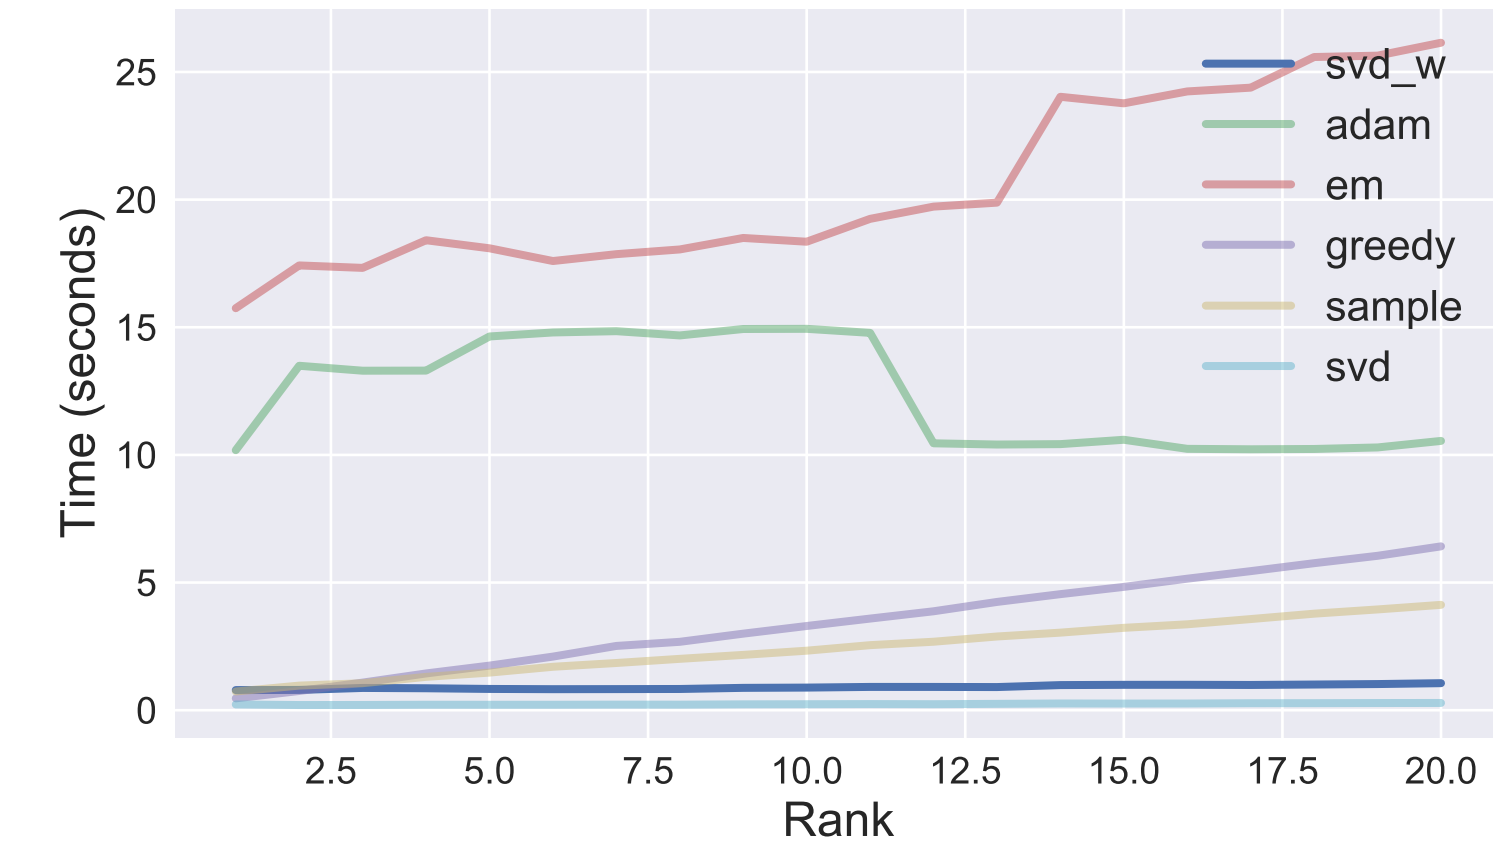

colorectal\_histology

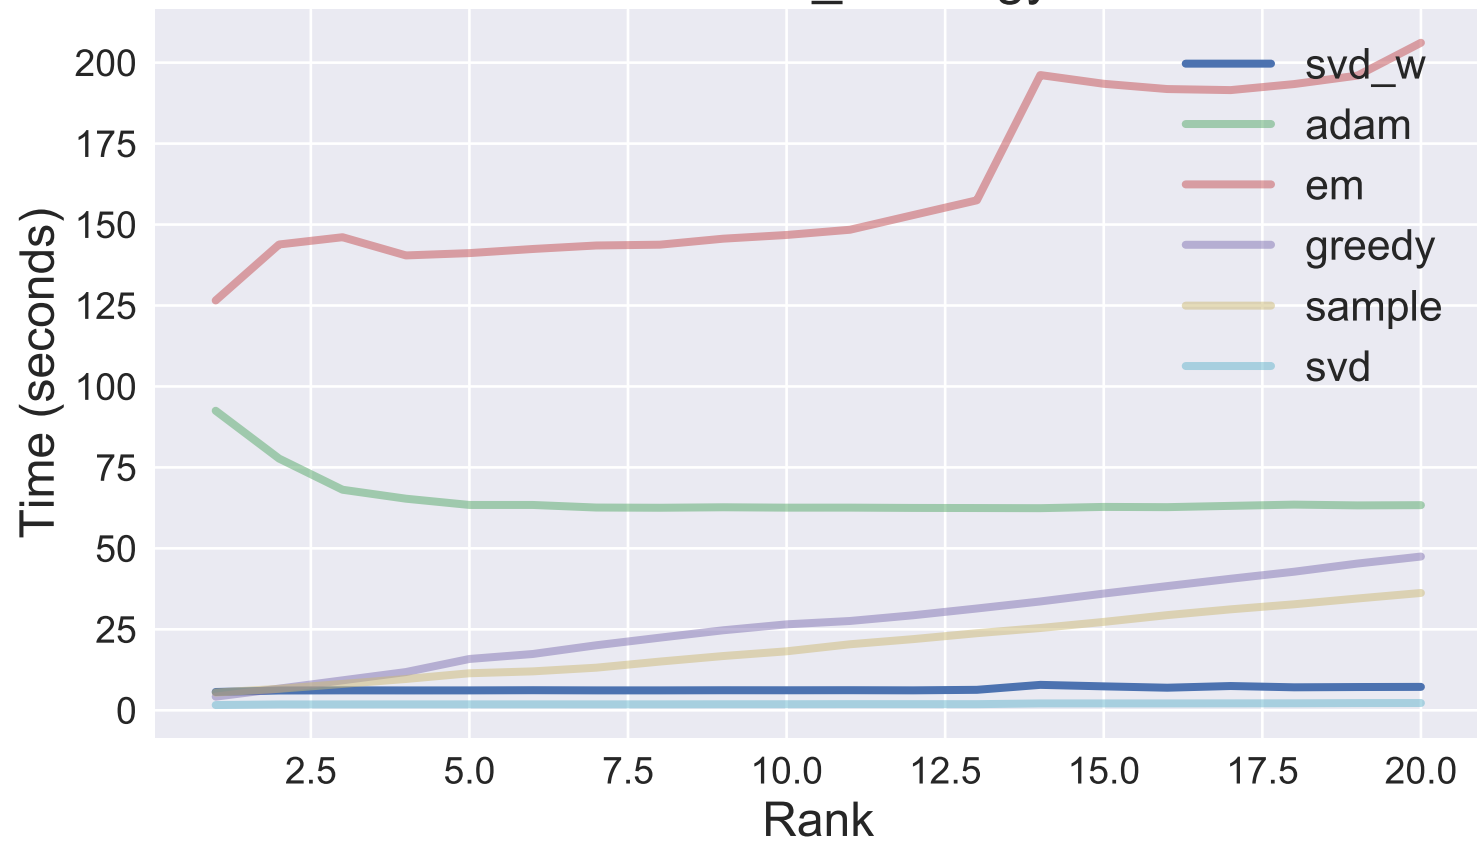

Supplement: supplementary_material [file attachment]

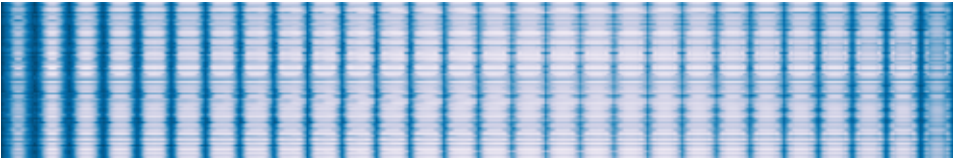

Supplement: supplementary_material [file attachment]

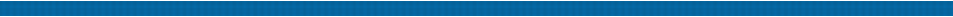

Supplement: supplementary_material [file attachment]
